# Supplementary material for: Rapid Fabrication of Fe and Pd Thin Films as SERS-Active Substrates via Dynamic Hydrogen Bubble Template Method
Source: MDPI journal article supplement (doi:10.3390/nano13010135), 2022-12-27
Supplement: s1 [file s1]

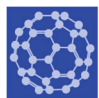

*Supplementary Material*

# Rapid Fabrication of Fe and Pd Thin Films as SERS-Active Substrates via Dynamic Hydrogen Bubble Template Method

Deepti Raj, Federico Scaglione\* and Paola Rizzi

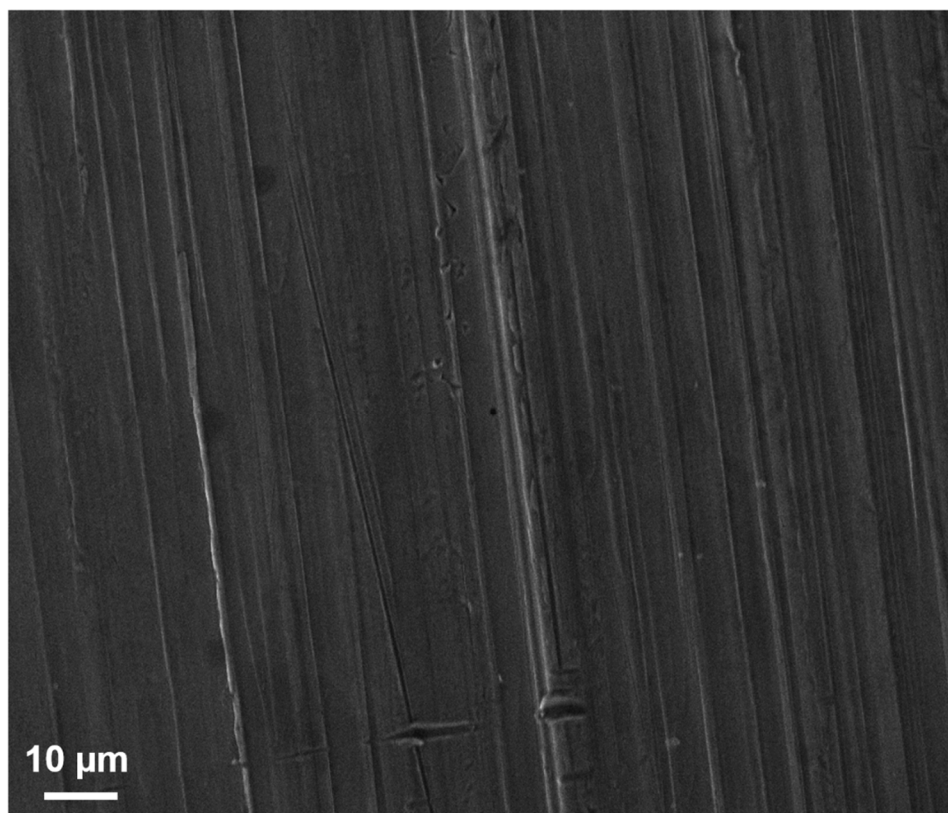

**Figure S1.** SEM image of the copper substrate.

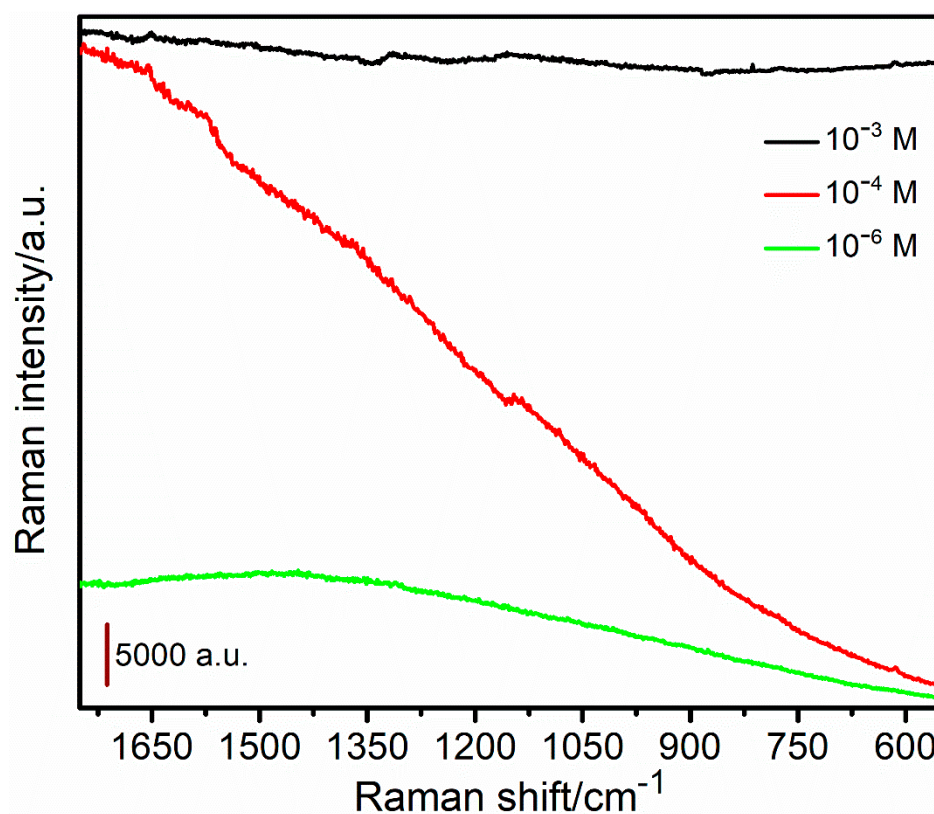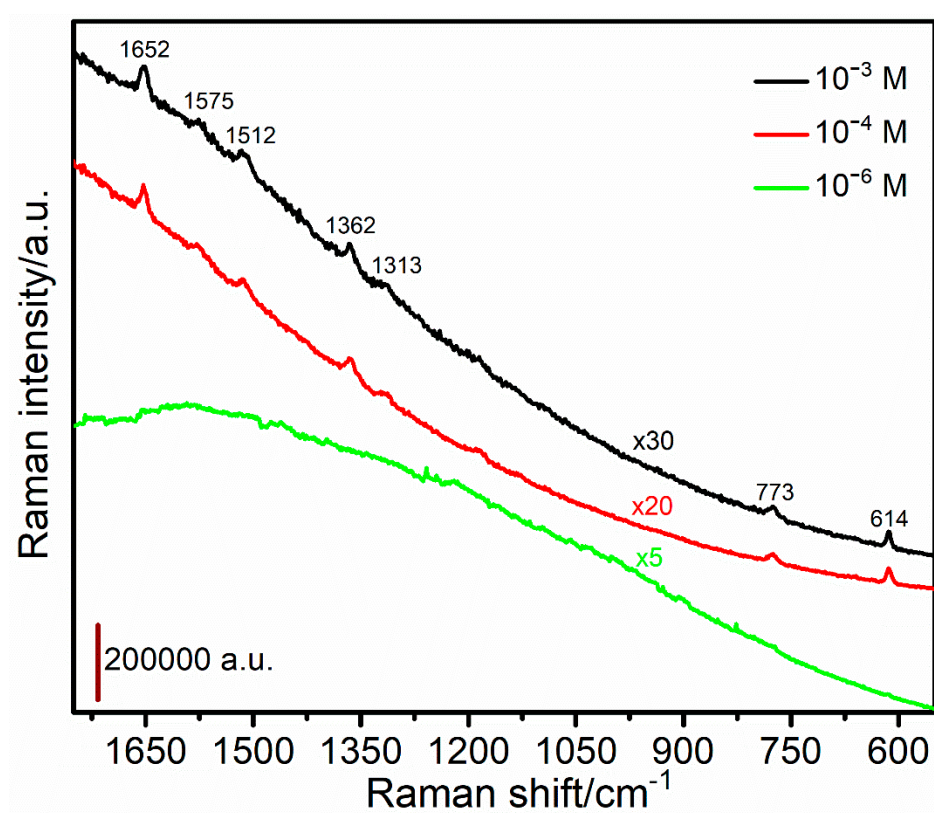

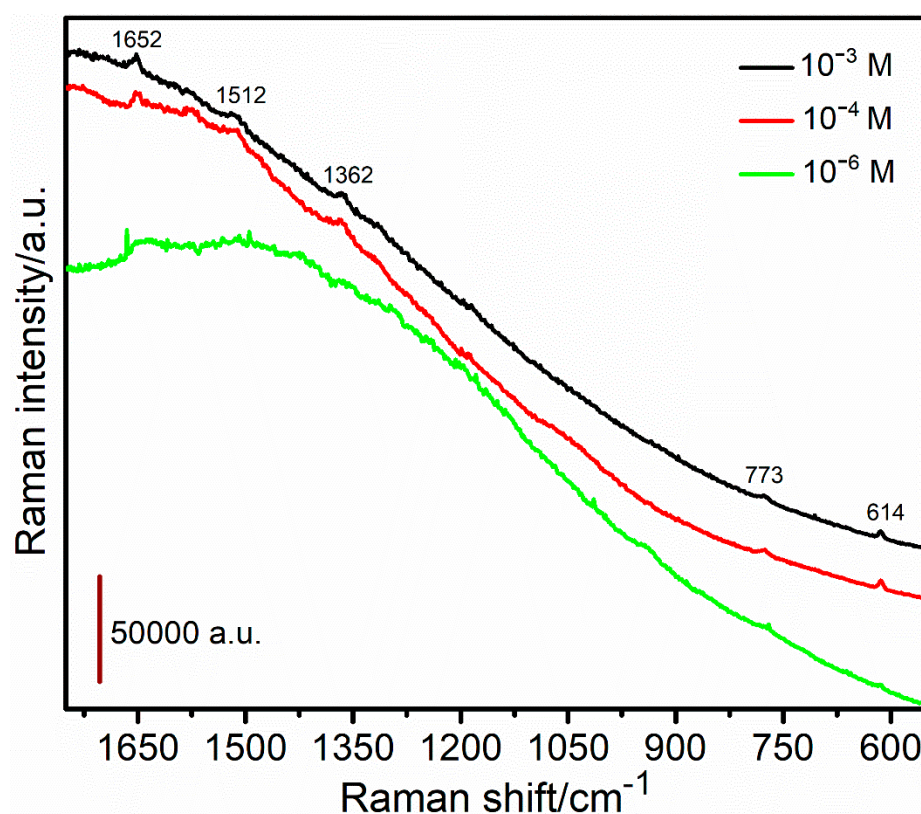

**Figure S2.** SERS spectra of Rhodamine 6G dye for different concentrations using (a) Fe90s, (b) Fe300s and (c) Pd90s as substrates.
